# Supplementary material for: Polyphenolic Profiling, Antioxidant, and Antimicrobial Activities Revealed the Quality and Adaptive Behavior of Viola Species, a Dietary Spice in the Himalayas
Source: MDPI journal article supplement (doi:10.3390/molecules27123867), 2022-06-16
Supplement: s1 [file s1]

### Supplementary Information

**Supplementary Table S1.** Voila species study area: Altitude, plant development phase, time of sampling; habitats, collection sites in Himachal Pradesh.

| Code           | Altitude | Species                | Habitat                | Plant Phase | Percentage yield | Location of collection     | Coordinates |            |
|----------------|----------|------------------------|------------------------|-------------|------------------|----------------------------|-------------|------------|
| <b>DKR V1</b>  | 375      | <i>Viola canescens</i> | Forest-shady locations | Flowering   | 35.66            | <b>Berthin, Bilaspur</b>   | 31.4188° N, | 76.6427° E |
| <b>DKR V2</b>  | 478      | <i>Viola canescens</i> | Forest-shady locations | Flowering   | 41.08            | <b>Telkar, Hamirpur</b>    | 31.6242° N, | 76.5692° E |
| <b>DKR V3</b>  | 492      | <i>Viola canescens</i> | Forest-shady locations | Flowering   | 37.83            | <b>Berru, Hamirpur</b>     | 31.6795° N, | 76.5387° E |
| <b>DKR V4</b>  | 699      | <i>Viola canescens</i> | Forest-shady locations | Flowering   | 35.78            | <b>Ghumarwin, Bilaspur</b> | 31.4491° N, | 76.7048° E |
| <b>DKR V5</b>  | 782      | <i>Viola canescens</i> | Road sides             | Flowering   | 44.61            | <b>Bijni, Mandi</b>        | 31.7460° N, | 76.9441° E |
| <b>DKR V6</b>  | 787      | <i>Viola canescens</i> | Forest-shady locations | Flowering   | 33.11            | <b>Chabutra, Hamirpur</b>  | 31.7699° N, | 76.4888° E |
| <b>DKR V7</b>  | 793      | <i>Viola canescens</i> | High mountain pasture  | Flowering   | 30.5             | <b>Paddar, Mandi</b>       | 31.8794° N, | 76.9160° E |
| <b>DKR V8</b>  | 858      | <i>Viola canescens</i> | Road sides             | Flowering   | 30.24            | <b>Pandoh, Mandi</b>       | 31.6676° N, | 77.0536° E |
| <b>DKR V9</b>  | 940      | <i>Viola canescens</i> | Road sides             | Flowering   | 36.47            | <b>Batour, Mandi</b>       | 31.7344° N, | 76.8865° E |
| <b>DKR V10</b> | 1220     | <i>Viola canescens</i> | High mountain pasture  | Flowering   | 32.02            | <b>Chauntra, Mandi</b>     | 32.0138° N, | 76.7495° E |
| <b>DKR V11</b> | 1269     | <i>Viola pilosa</i>    | High mountain pasture  | Flowering   | 28.96            | <b>Kamand, Mandi</b>       | 31.7781° N, | 76.9974° E |
| <b>DKR V12</b> | 1279     | <i>Viola canescens</i> | Forest-shady locations | Flowering   | 25.92            | <b>Kullu</b>               | 31.9592° N, | 77.1089° E |

|                |          |                        |                       |           |       |                         |                           |
|----------------|----------|------------------------|-----------------------|-----------|-------|-------------------------|---------------------------|
| <b>DKR V13</b> | 148<br>2 | <i>Viola canescens</i> | High mountain pasture | Flowering | 44.07 | <b>Chandpur, Kangra</b> | 32.1215° N,<br>76.5654° E |
| <b>DKR V14</b> | 163<br>9 | <i>Viola canescens</i> | High mountain pasture | Flowering | 31.48 | <b>Gulera, Chamba</b>   | 32.5527° N,<br>76.1260° E |
| <b>DKR V15</b> | 182<br>9 | <i>Viola pilosa</i>    | High mountain pasture | Flowering | 28.95 | <b>Barot, Mandi</b>     | 32.0410° N,<br>76.8402° E |

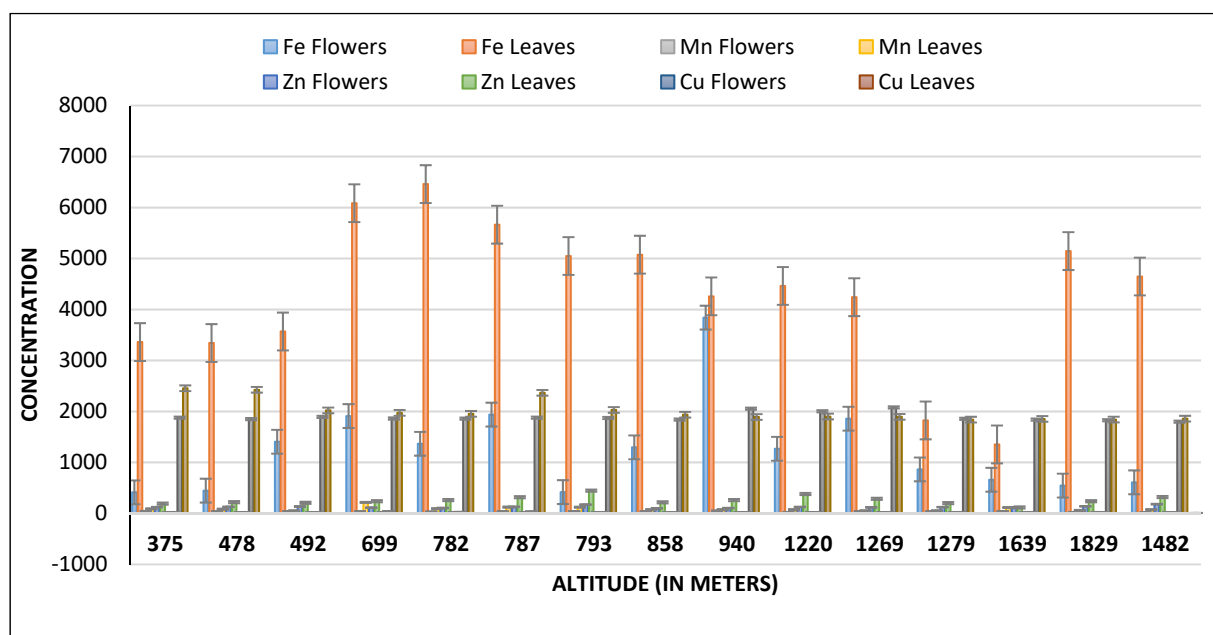

**Supplementary Figure S1.** Micro-nutrients in Viola species at gradient altitudes (in ppm)

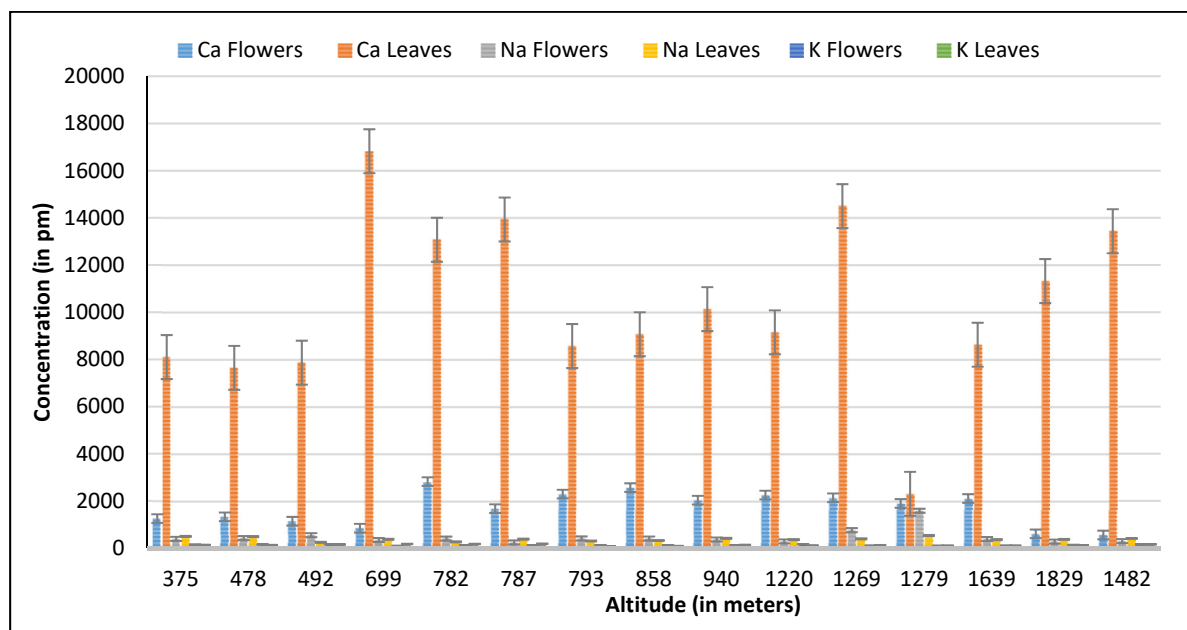

**Supplementary Figure S2.** Macro-nutrients in Viola species at gradient altitudes (in ppm)

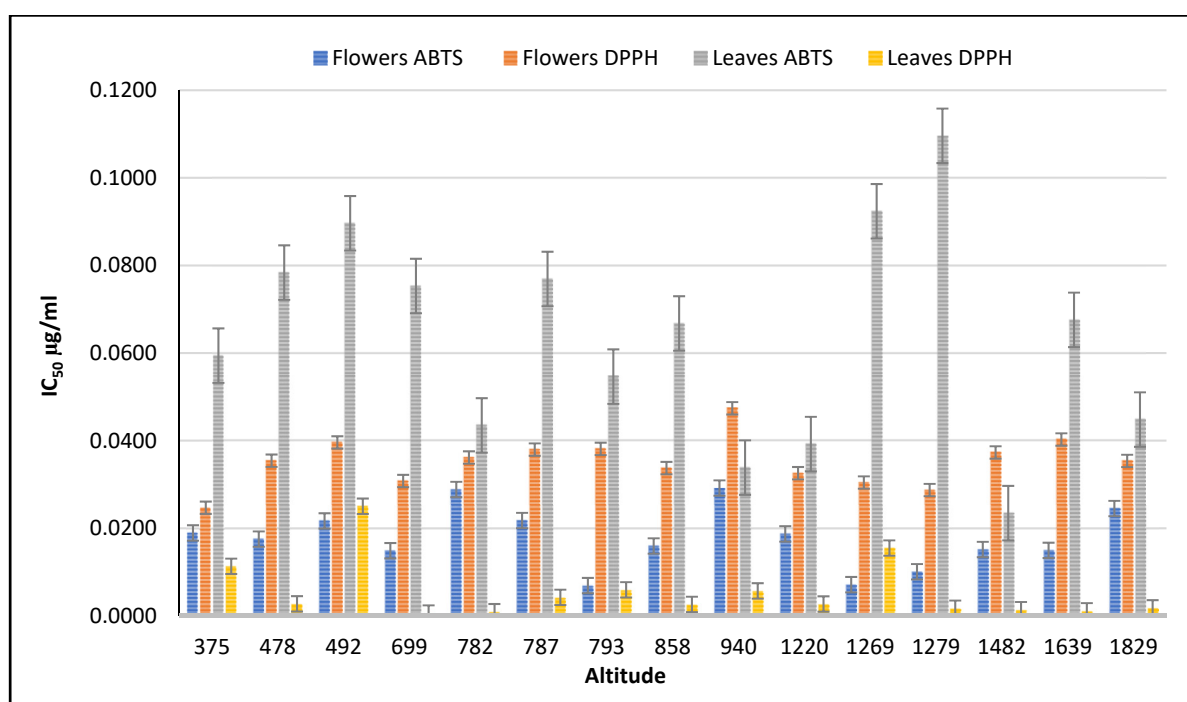

**Supplementary Figure S3.** ABTS & DPPH based antioxidant activity of (IC<sub>50</sub> µg/ml) of Viola species.

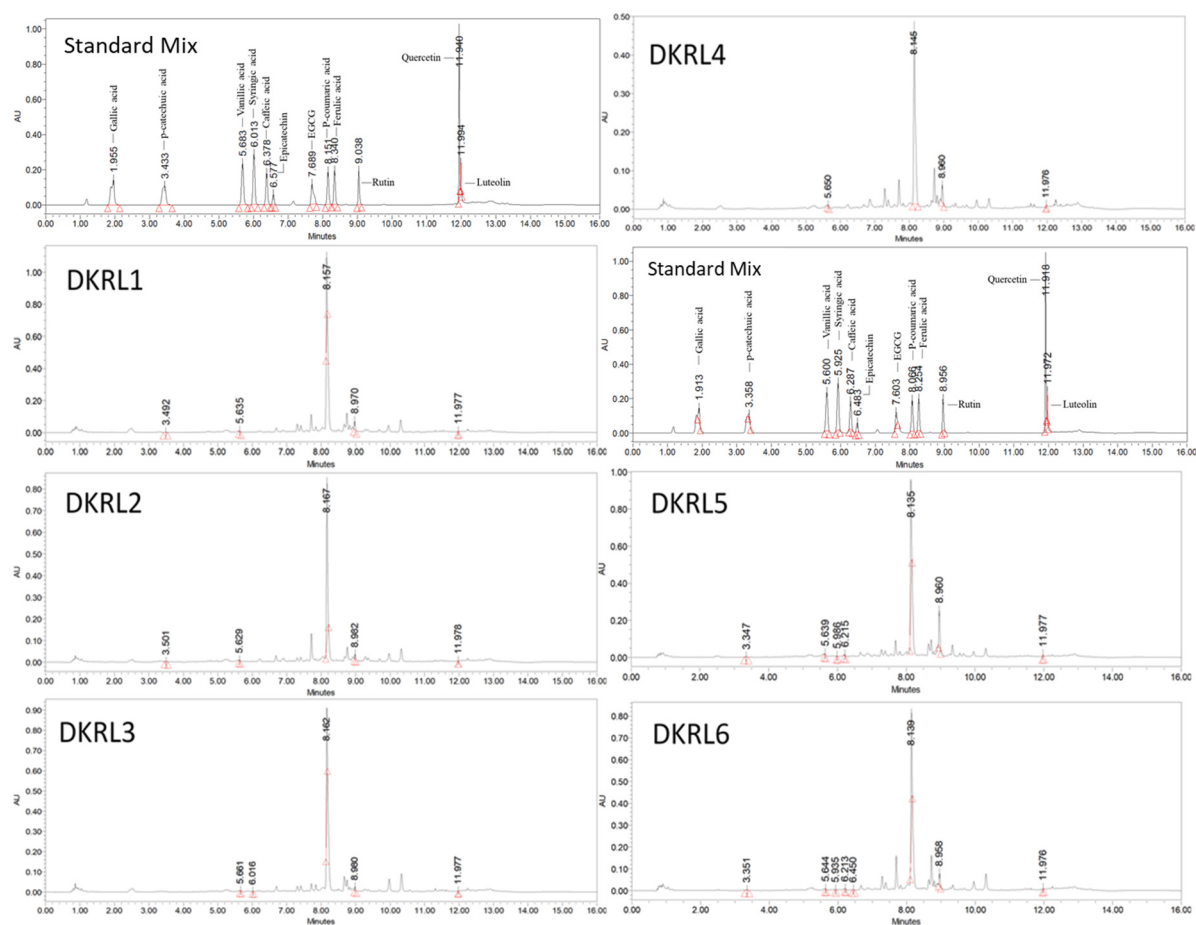

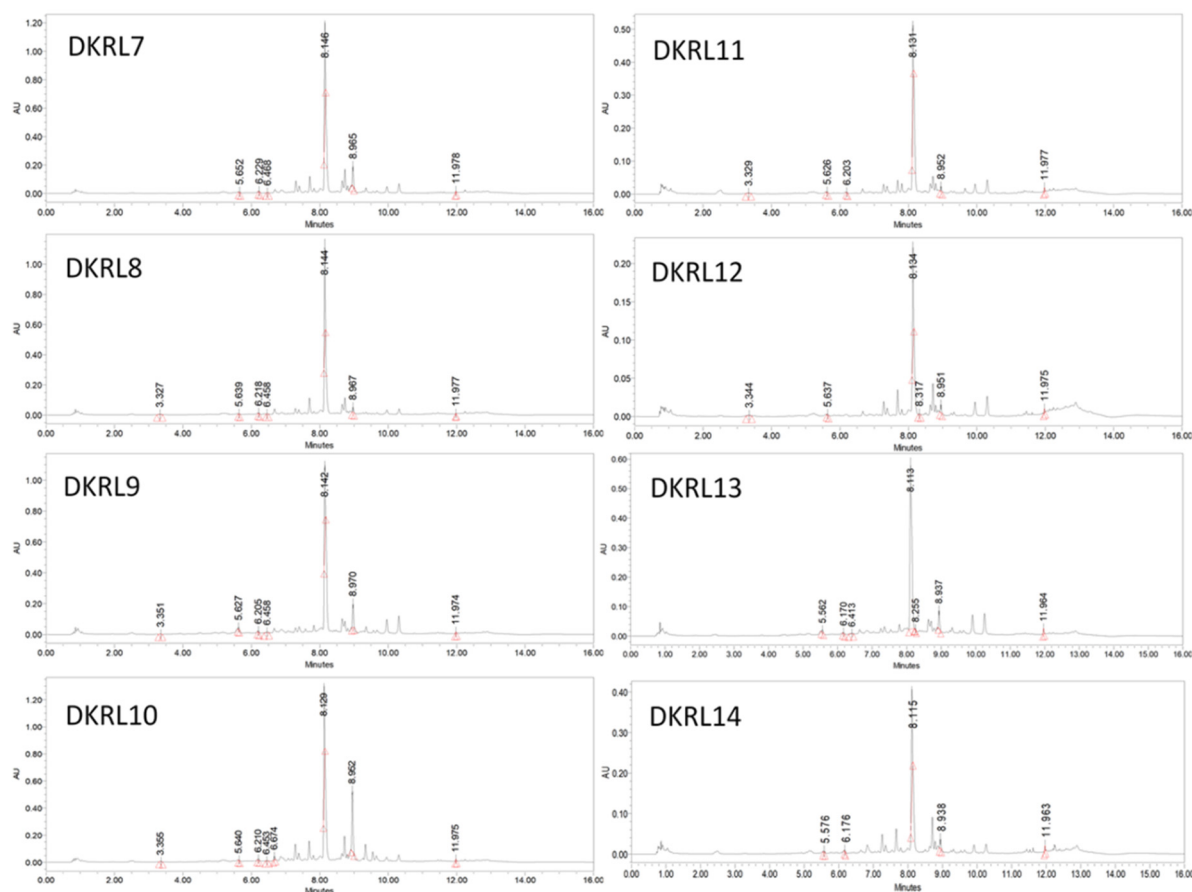

**Supplementary Figure S4a.** UPLC-DAD Chromatograms of flowers samples of *Viola* species (DKRL1-DKRL15).

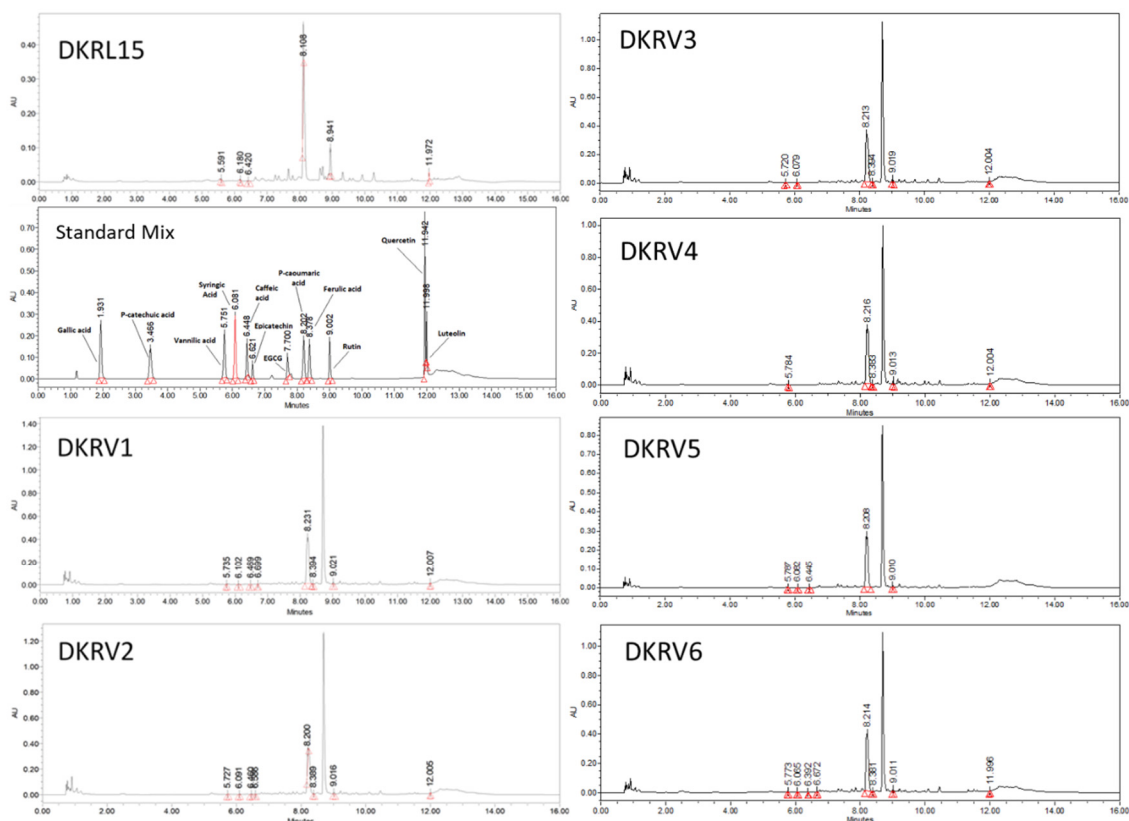

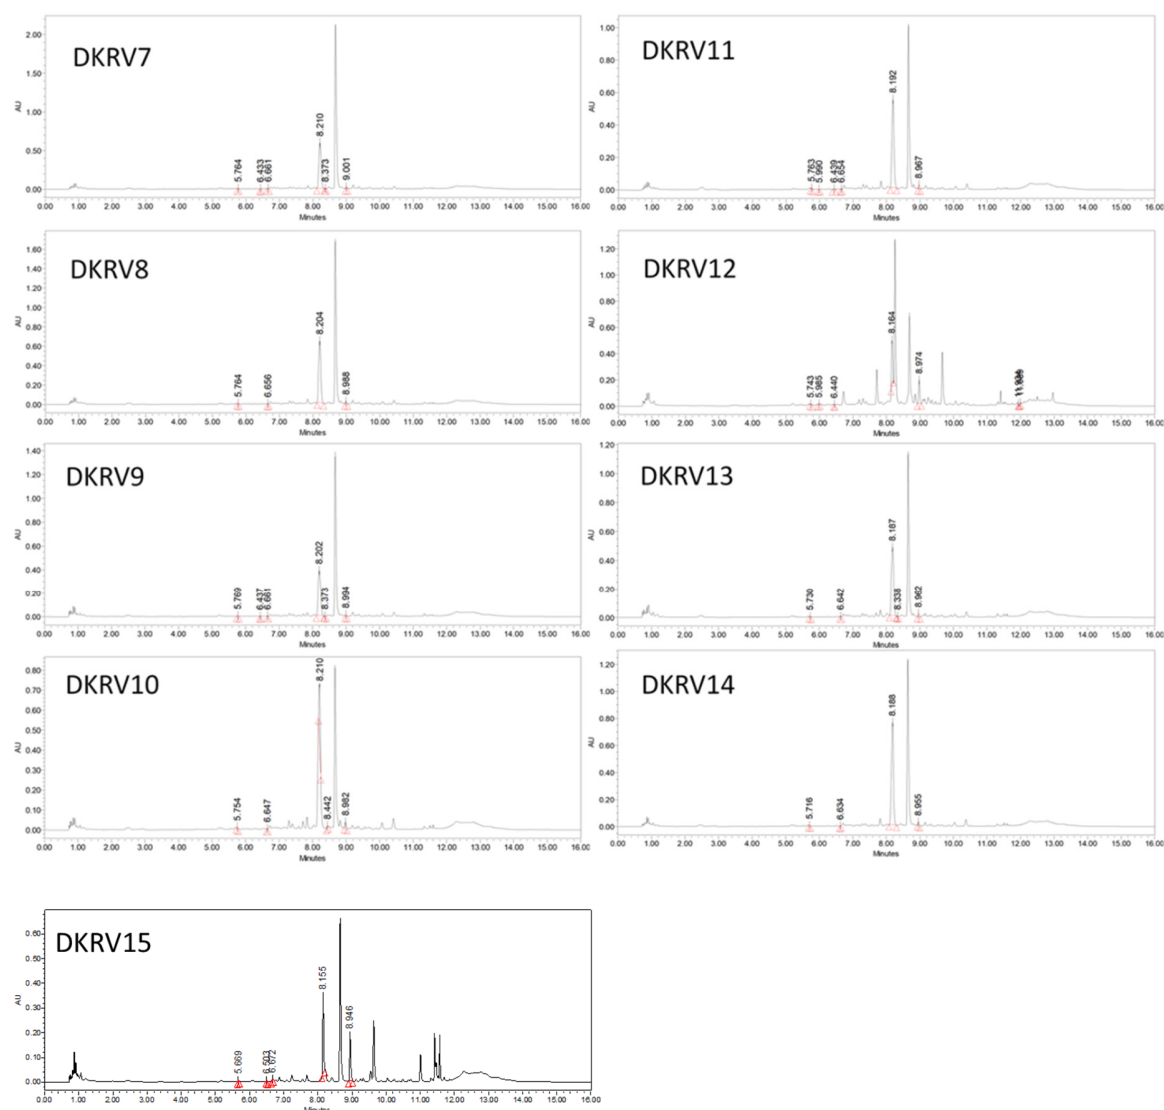

**Supplementary Figure S4b.** UPLC-DAD Chromatograms of flowers samples of *Viola* species (DKRV1-DKRV15).

**Supplementary Table S2.** MIC's of the most effective plant extract against *S. aureus* & *B. subtilis*.

| Zone of inhibition (mm) |                    |    |     |     |                  |     |     |     |                    |     |     |     |                  |    |     |     |
|-------------------------|--------------------|----|-----|-----|------------------|-----|-----|-----|--------------------|-----|-----|-----|------------------|----|-----|-----|
| Gram +ve bacteria       |                    |    |     |     |                  |     |     |     |                    |     |     |     |                  |    |     |     |
| Conc.<br>(mg)           | <i>B. subtilis</i> |    |     |     | <i>S. aureus</i> |     |     |     | <i>B. subtilis</i> |     |     |     | <i>S. aureus</i> |    |     |     |
|                         | L1                 | L7 | L13 | L14 | L1               | L7  | L13 | L14 | V7                 | V9  | V12 | V13 | V7               | V9 | V12 | V13 |
| 0.5                     | 0                  | 0  | 0   | 0   | 0                | 0   | 0   | 0   | 0                  | 0   | 0   | 0   | 0                | 0  | 0   | 0   |
| 1                       | 0                  | 0  | 0   | 0   | 0                | 0   | 0   | 0   | 0                  | 0   | 0   | 0   | 0                | 0  | 0   | 0   |
| 2                       | 0                  | 0  | 0   | 0   | 0                | 0   | 0   | 0   | 0                  | 0   | 0   | 0   | 0                | 0  | 0   | 0   |
| 3                       | 0                  | 1  | 0   | 0   | 0                | 0   | 0   | 0   | 0                  | 0   | 0   | 0   | 0                | 0  | 0   | 0   |
| 4                       | 1                  | 1  | 0   | 0.5 | 1                | 1   | 0.5 | 1   | 0                  | 1.5 | 1   | 0.5 | 0                | 0  | 0   | 0   |
| 5                       | 1.5                | 2  | 1   | 1   | 1.5              | 1.5 | 1   | 2   | 2                  | 2   | 3   | 1   | 0                | 1  | 1   | 0.5 |
| 6                       | 4                  | 3  | 4   | 4   | 3                | 3   | 4   | 4   | 5                  | 5   | 5   | 5   | 1                | 2  | 2.5 | 2.5 |

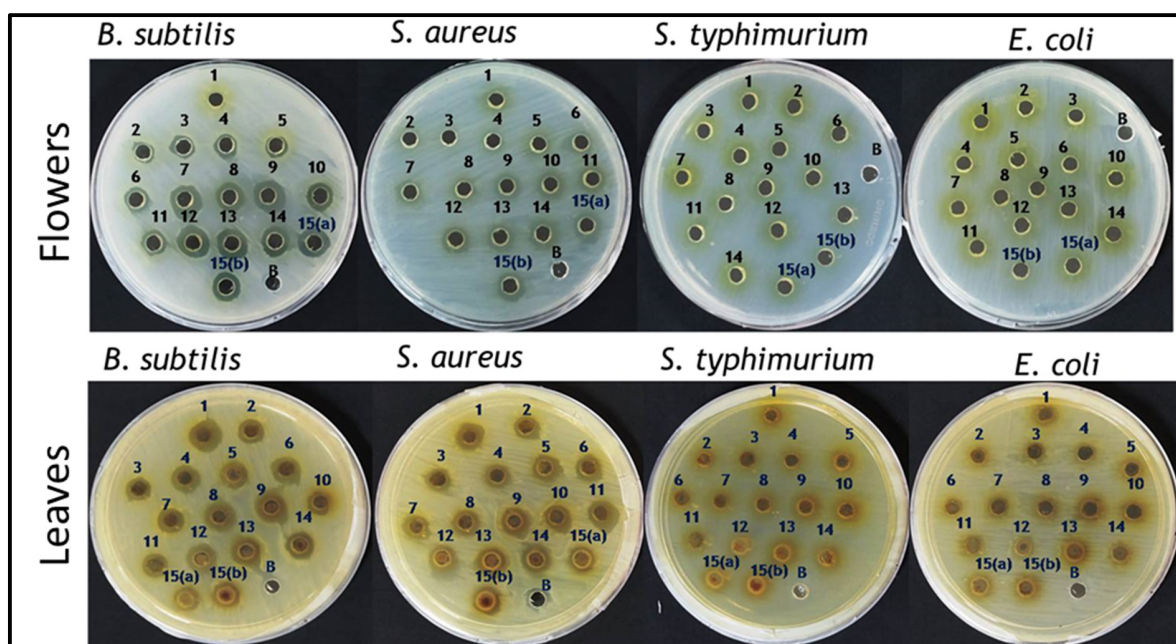

**Supplementary Figure S5.** Antimicrobial activity (Zone of inhibition of flowers and leaves) of *Viola* species.
